# Supplementary material for: Demographics, Radiological Findings, and Clinical Outcomes of Klebsiella pneumonia vs. Non-Klebsiella pneumoniae Pyogenic Liver Abscess: A Systematic Review and Meta-Analysis with Trial Sequential Analysis
Source: MDPI journal article supplement (doi:10.3390/pathogens11090976), 2022-08-26

## Supplementary Material

**Supplementary Table S1: Search strategy used in all the databases**

| Database      | Search strategy                                                                                                                                                                                                                                                                                                                                                                                                                                                                                                                                                                                                                                                                                                                                                                                             |
|---------------|-------------------------------------------------------------------------------------------------------------------------------------------------------------------------------------------------------------------------------------------------------------------------------------------------------------------------------------------------------------------------------------------------------------------------------------------------------------------------------------------------------------------------------------------------------------------------------------------------------------------------------------------------------------------------------------------------------------------------------------------------------------------------------------------------------------|
| PubMed        | (Liver Abscess, Pyogenic[MeSH Terms]) OR (Pyogenic Hepatic Abscess*[Title/Abstract]) OR (Pyogenic Hepatic Abscess*[Other Term]) OR (Pyogenic Liver Abscess*[Title/Abstract]) OR (Pyogenic Liver Abscess*[Other Term]) OR (Liver Abscess*[Other Term]) OR (Liver Abscess*[Title/Abstract]) OR (Hepatic Abscess*[Title/Abstract]) OR (Hepatic Abscess*[Other Term]) OR (Liver Abscess[MeSH Terms]) AND ( <i>Klebsiella pneumoniae</i> [MeSH Terms]) OR ( <i>Klebsiella pneumoniae</i> [Title/Abstract]) OR ( <i>Klebsiella pneumoniae</i> [Other Term]) OR ( <i>K.pneumoniae</i> [Title/Abstract]) OR ( <i>K.pneumoniae</i> [Other Term]) OR ( <i>K. pneumoniae</i> [Title/Abstract]) OR ( <i>K. pneumoniae</i> [Other Term]) OR ( <i>Klebsiella</i> *[Title/Abstract]) OR ( <i>Klebsiella</i> *[Other Term]) |
| Embase (Ovid) | ("liver abscess pyogenic" or "pyogenic hepatic abscess*" or "pyogenic liver abscess*" or "liver abscess*" or "hepatic abscess*").ti,ab,tw. AND (" <i>klebsiella pneumoniae</i> " or " <i>k.pneumoniae</i> " or " <i>k. pneumoniae</i> " or <i>klebsiella</i> *).ti,ab,tw.                                                                                                                                                                                                                                                                                                                                                                                                                                                                                                                                   |
| Scopus        | TITLE-ABS-KEY ("liver abscess pyogenic" or "pyogenic hepatic abscess*" or "pyogenic liver abscess*" or "liver abscess*" or "hepatic abscess*") AND TITLE-ABS-KEY (" <i>klebsiella pneumoniae</i> " or " <i>k.pneumoniae</i> " or " <i>k. pneumoniae</i> " or <i>klebsiella</i> *)                                                                                                                                                                                                                                                                                                                                                                                                                                                                                                                           |
| Cochrane      | ("liver abscess pyogenic" or "pyogenic hepatic abscess*" or "pyogenic liver abscess*" or "liver abscess*" or "hepatic abscess*"):ti,ab,kw. AND (" <i>klebsiella pneumoniae</i> " or " <i>k.pneumoniae</i> " or " <i>k. pneumoniae</i> " or <i>klebsiella</i> *):ti,ab,kw.                                                                                                                                                                                                                                                                                                                                                                                                                                                                                                                                   |

**Supplementary Table S2: Quality assessment of all included observational studies (n=16) using the Newcastle-Ottawa Scale**

| No | First author, year | Selection                    |                                 |                           |                                                                      | Comparability                                                 | Outcome               |                     |                       | Quality score* |
|----|--------------------|------------------------------|---------------------------------|---------------------------|----------------------------------------------------------------------|---------------------------------------------------------------|-----------------------|---------------------|-----------------------|----------------|
|    |                    | Representativeness of cohort | Selection of non-exposed cohort | Ascertainment of exposure | Demonstration that current outcome was not present at start of study | Comparability of cohorts on basis of study design or analysis | Assessment of outcome | Length of follow-up | Adequacy of follow-up |                |
| 1  | Kong, 2017         | 1                            | 1                               | 1                         | 0                                                                    | 0                                                             | 1                     | 1                   | 1                     | 6              |
| 2  | Yin, 2021          | 1                            | 1                               | 1                         | 0                                                                    | 0                                                             | 1                     | 1                   | 1                     | 6              |
| 3  | Chen, 2007         | 1                            | 1                               | 1                         | 0                                                                    | 2                                                             | 1                     | 1                   | 1                     | 8              |
| 4  | Wang, 2013         | 1                            | 1                               | 1                         | 0                                                                    | 0                                                             | 1                     | 1                   | 1                     | 6              |
| 5  | Kim, 2007          | 1                            | 1                               | 1                         | 0                                                                    | 0                                                             | 1                     | 1                   | 1                     | 6              |
| 6  | Alsaif, 2011       | 1                            | 1                               | 1                         | 0                                                                    | 0                                                             | 1                     | 1                   | 1                     | 6              |
| 7  | Lee, 2011          | 1                            | 1                               | 1                         | 0                                                                    | 2                                                             | 1                     | 1                   | 1                     | 8              |
| 8  | Li, 2010           | 1                            | 1                               | 1                         | 0                                                                    | 0                                                             | 1                     | 1                   | 1                     | 6              |
| 9  | Baek, 2017         | 1                            | 1                               | 1                         | 0                                                                    | 2                                                             | 1                     | 1                   | 1                     | 8              |
| 10 | Huang, 2012        | 1                            | 1                               | 1                         | 1                                                                    | 2                                                             | 1                     | 1                   | 1                     | 9              |
| 11 | Chen, 2014         | 1                            | 1                               | 1                         | 0                                                                    | 0                                                             | 1                     | 1                   | 1                     | 6              |
| 12 | Shelat, 2015       | 1                            | 1                               | 1                         | 0                                                                    | 0                                                             | 1                     | 1                   | 1                     | 6              |
| 13 | Hui, 2007          | 1                            | 1                               | 1                         | 0                                                                    | 0                                                             | 1                     | 1                   | 1                     | 6              |
| 14 | Lee, 2020          | 1                            | 1                               | 1                         | 0                                                                    | 2                                                             | 1                     | 1                   | 1                     | 8              |
| 15 | Qian, 2016         | 1                            | 1                               | 1                         | 0                                                                    | 0                                                             | 1                     | 1                   | 1                     | 6              |
| 16 | Mousa, 2021        | 1                            | 1                               | 1                         | 0                                                                    | 1                                                             | 1                     | 1                   | 1                     | 7              |

\*Quality score of <3: Low quality of evidence, 3-6: Moderate quality of evidence,  $\geq 7$ : High quality of evidence

## Supplementary Figures

Supplementary Figure S1: Funnel plots of included studies (A) Clinical demographics, (B) Radiological findings and (C) Clinical outcomes

(A) Clinical demographics

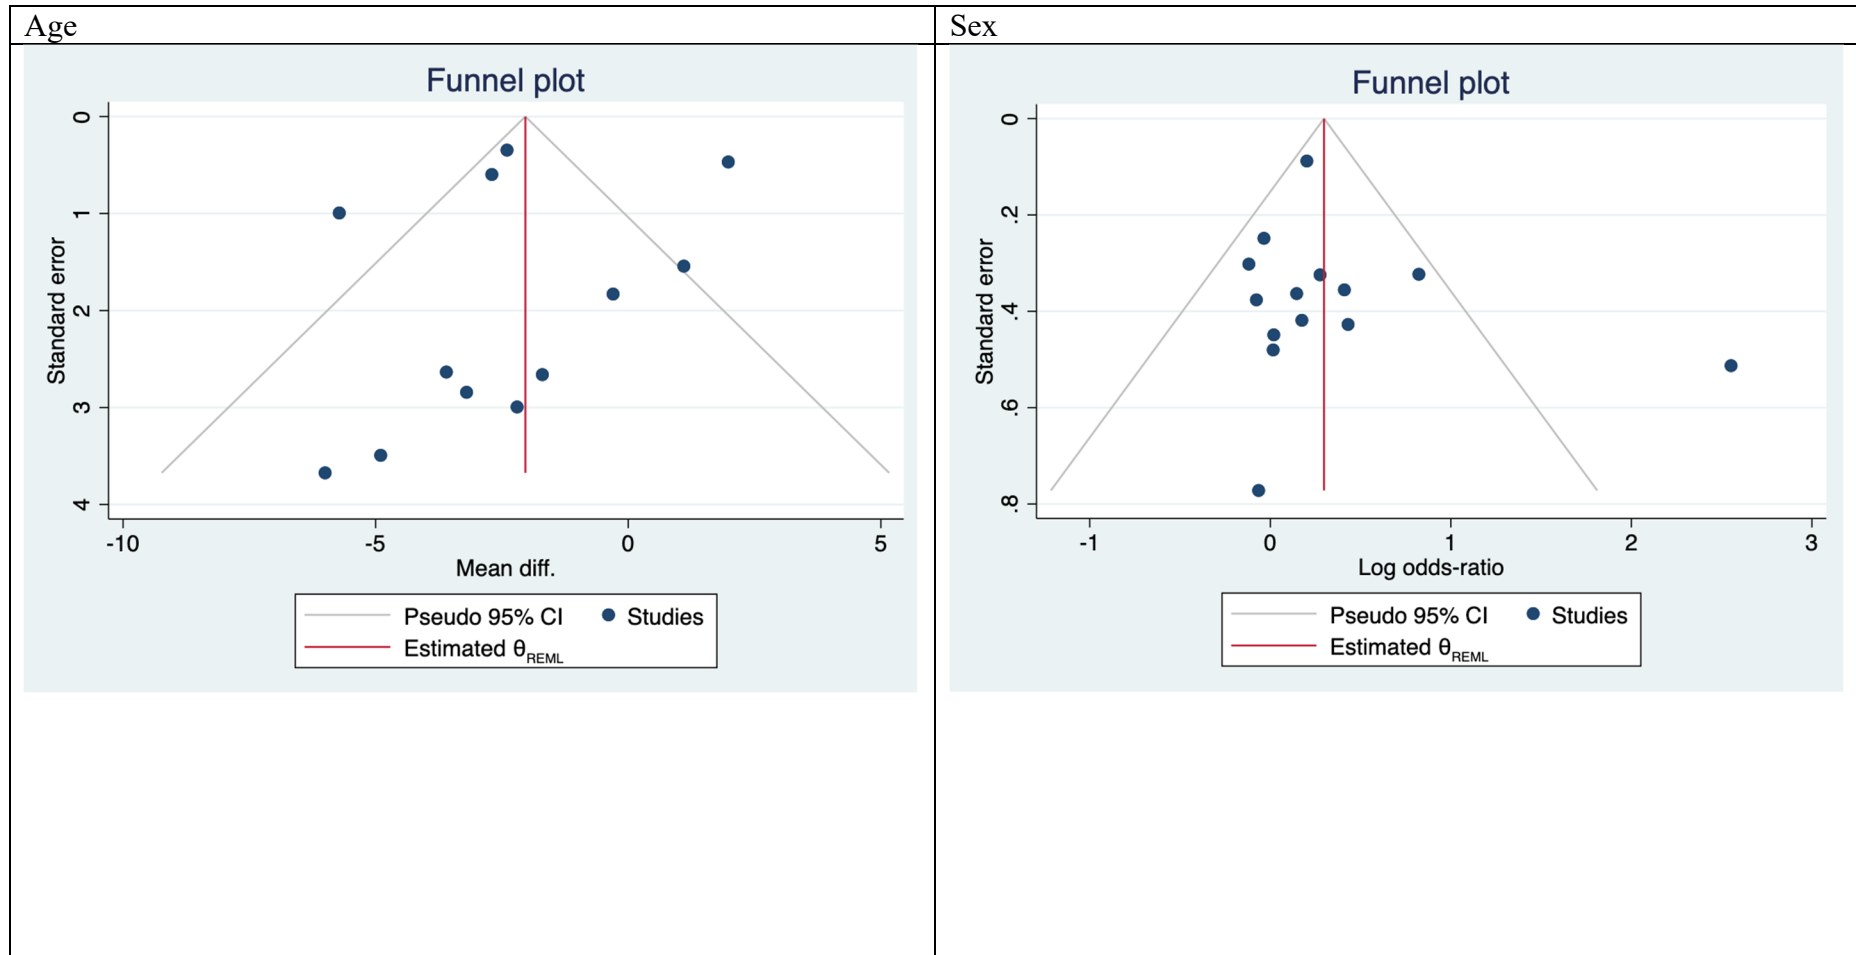

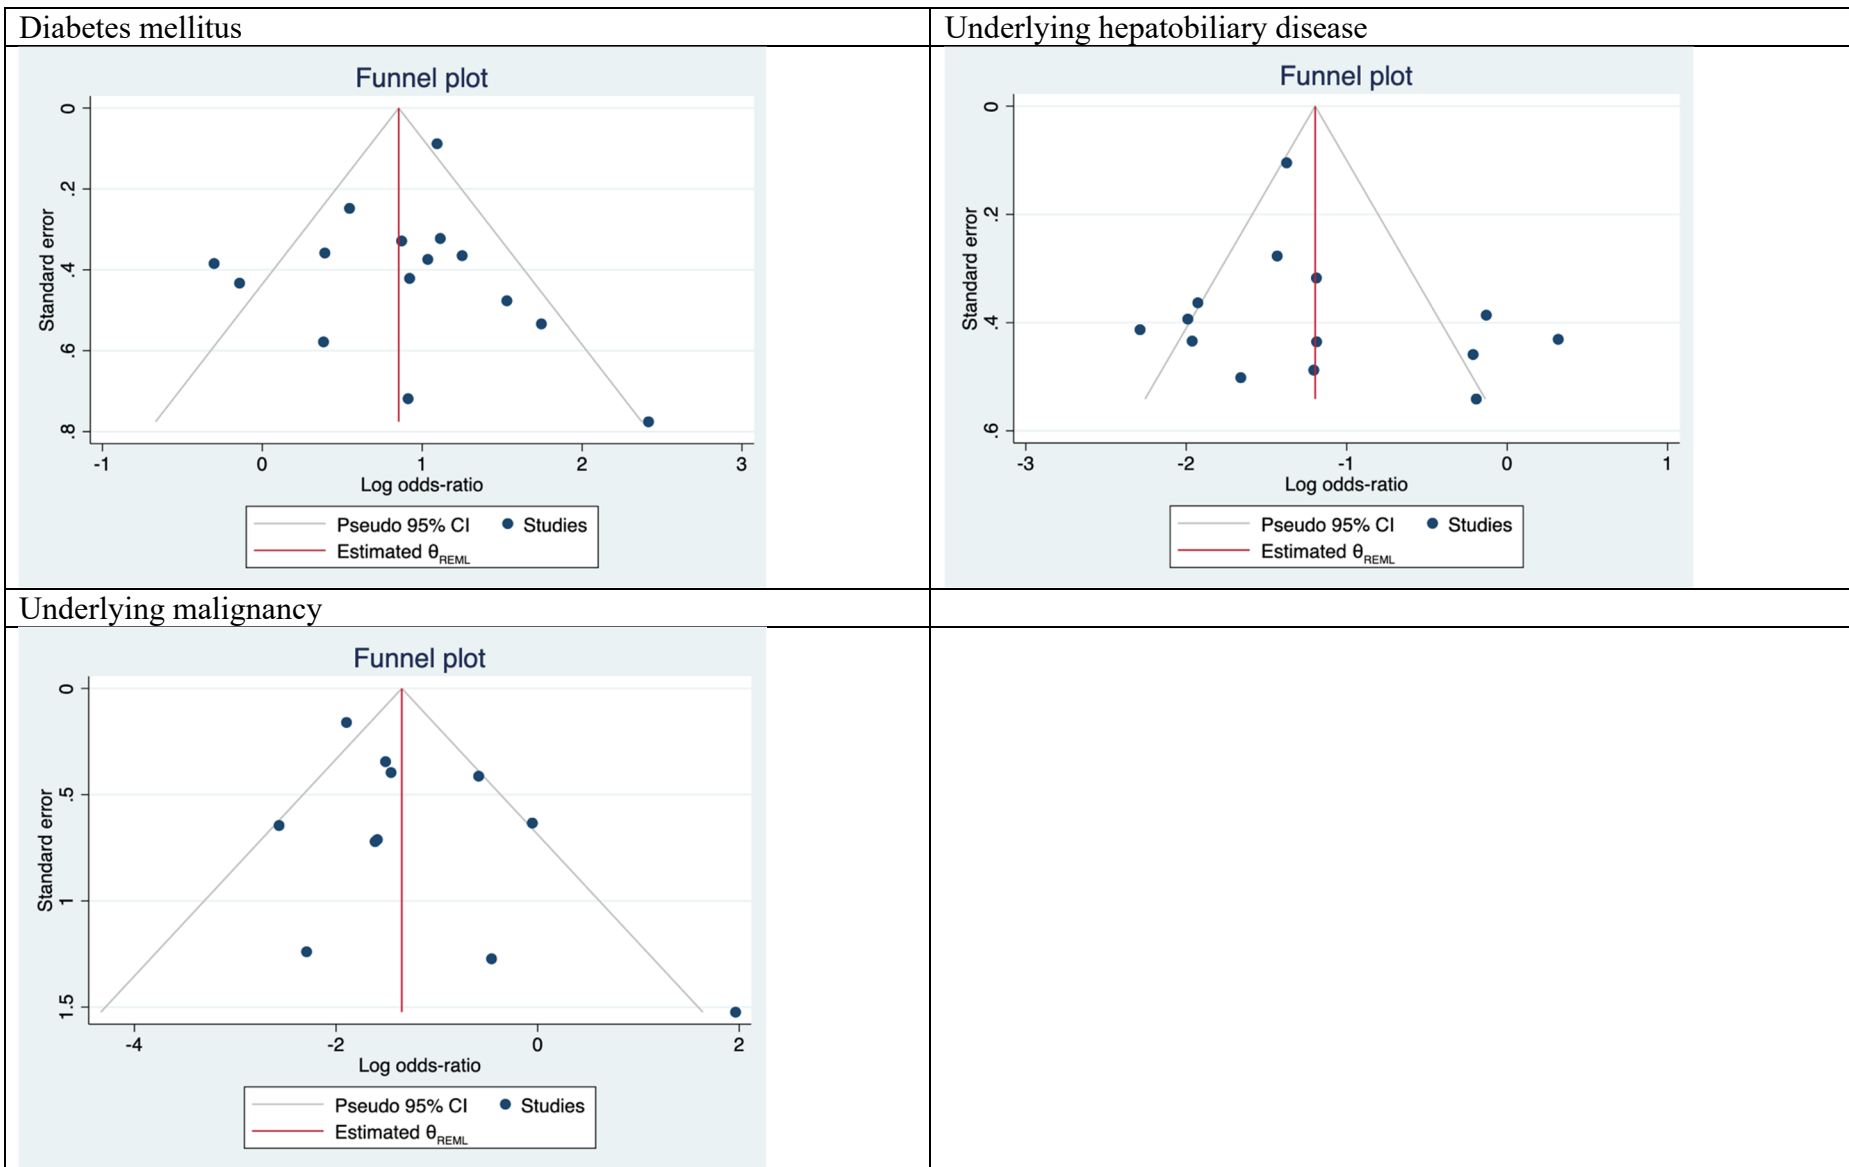

(B) Radiological findings

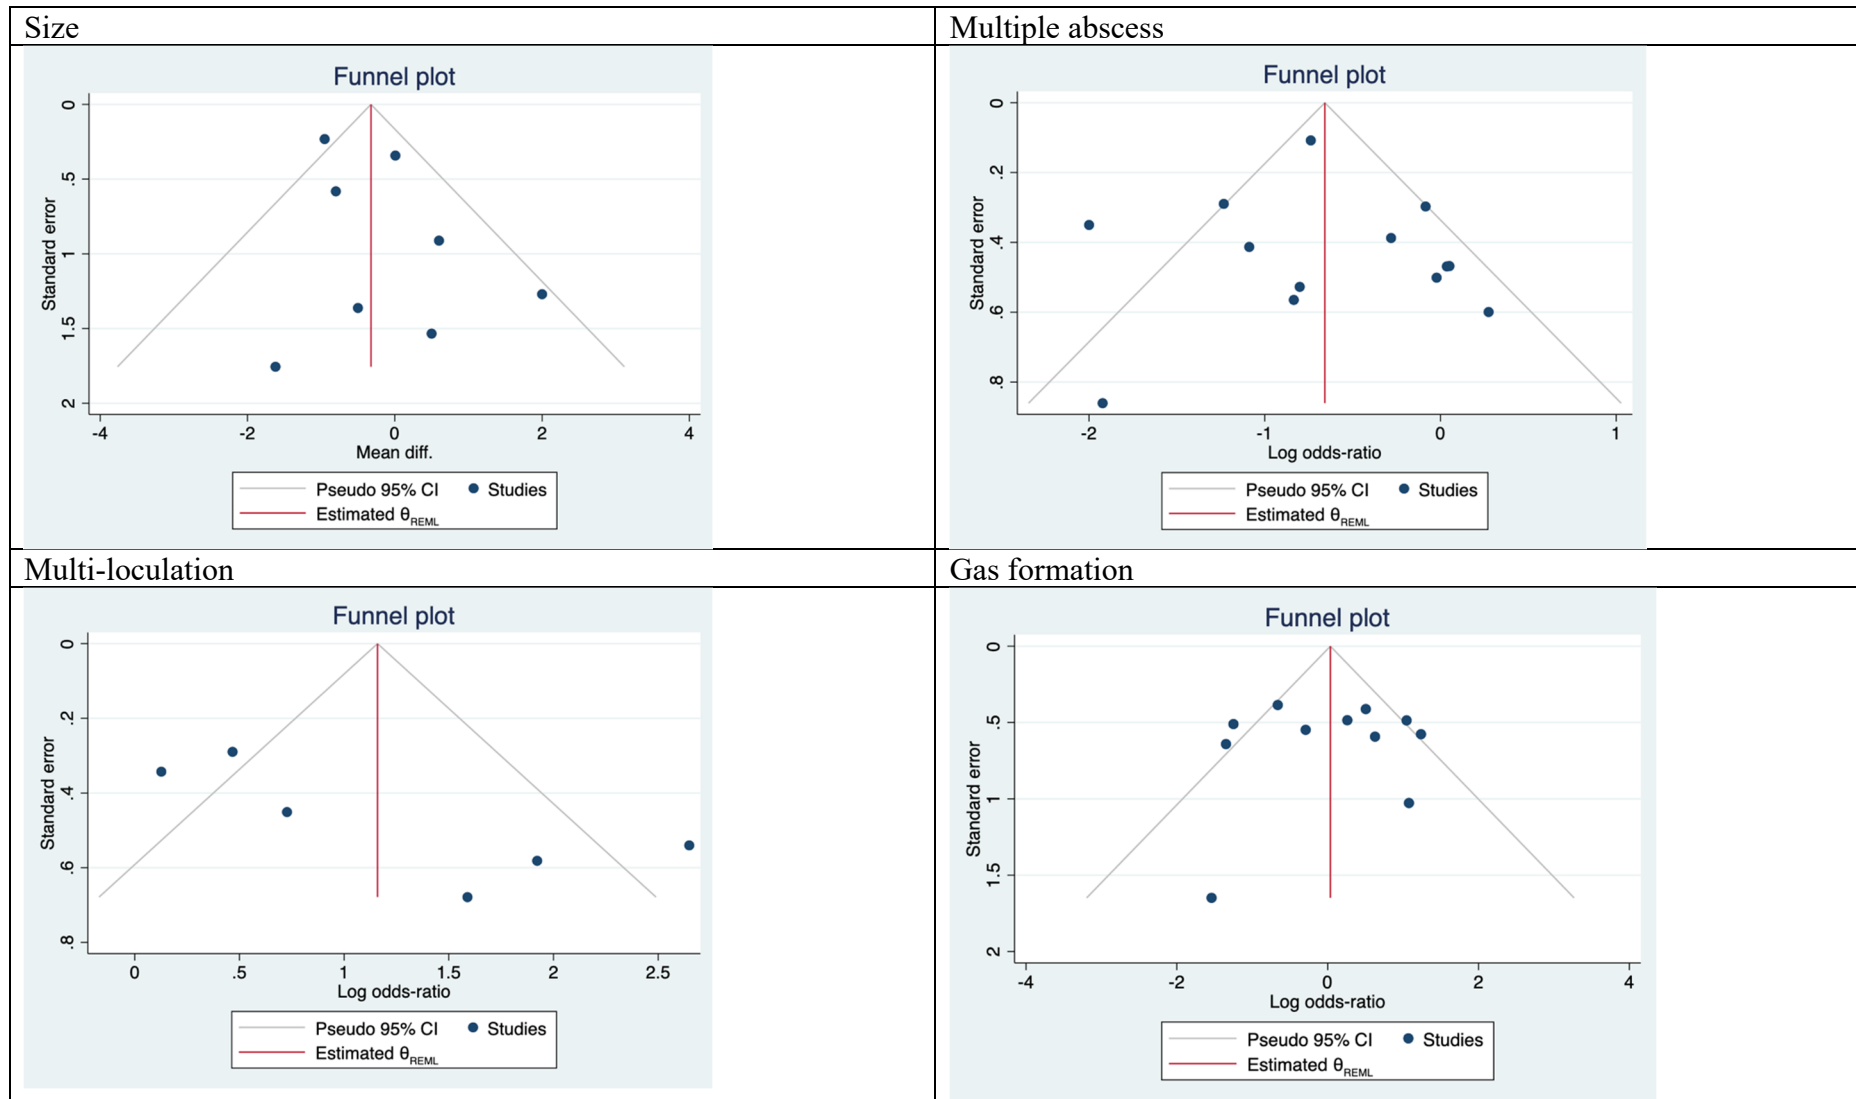

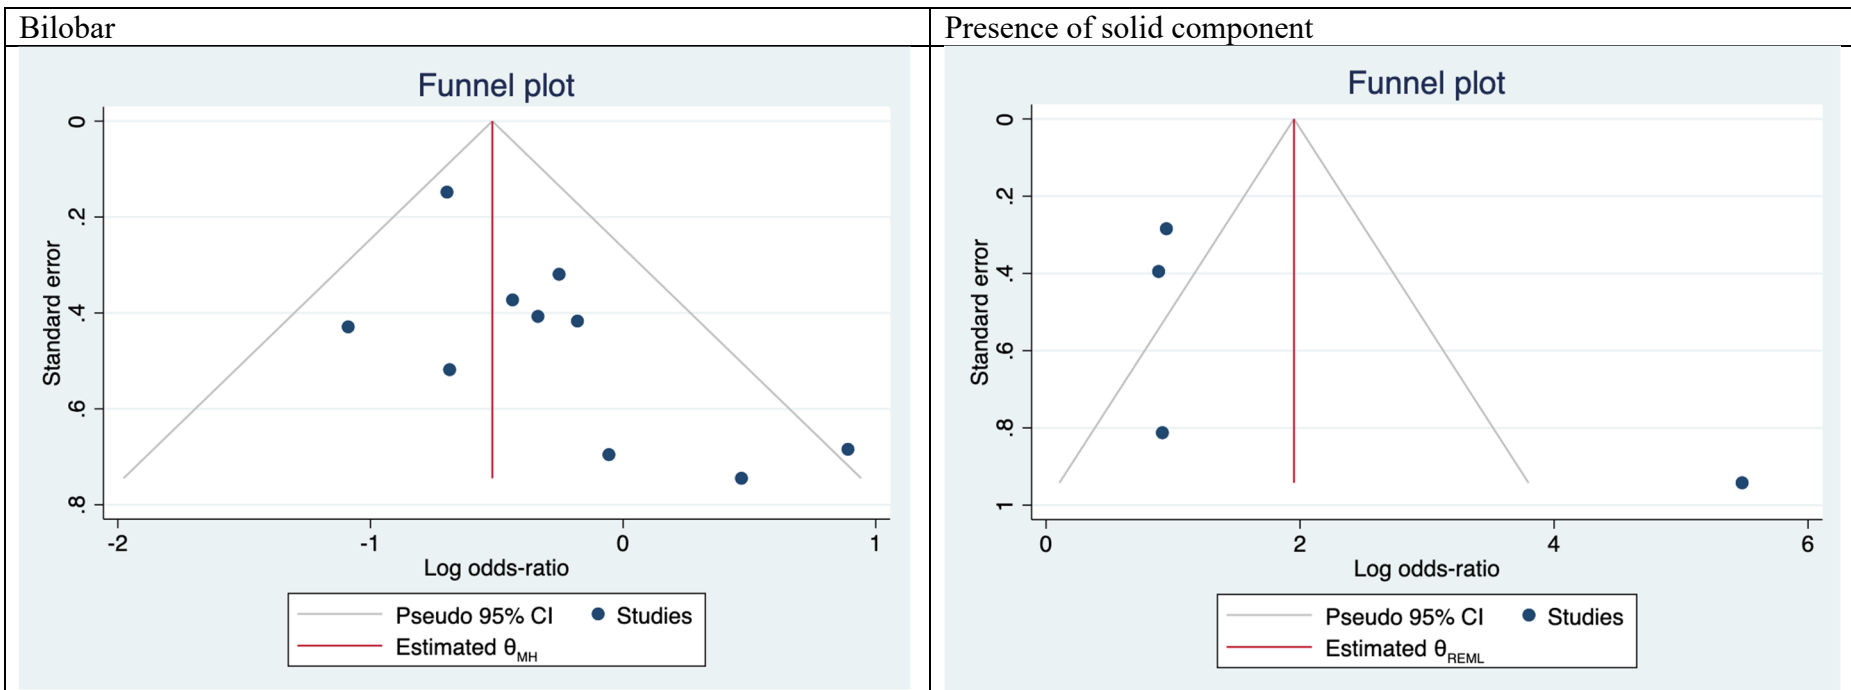

(C) Clinical outcomes

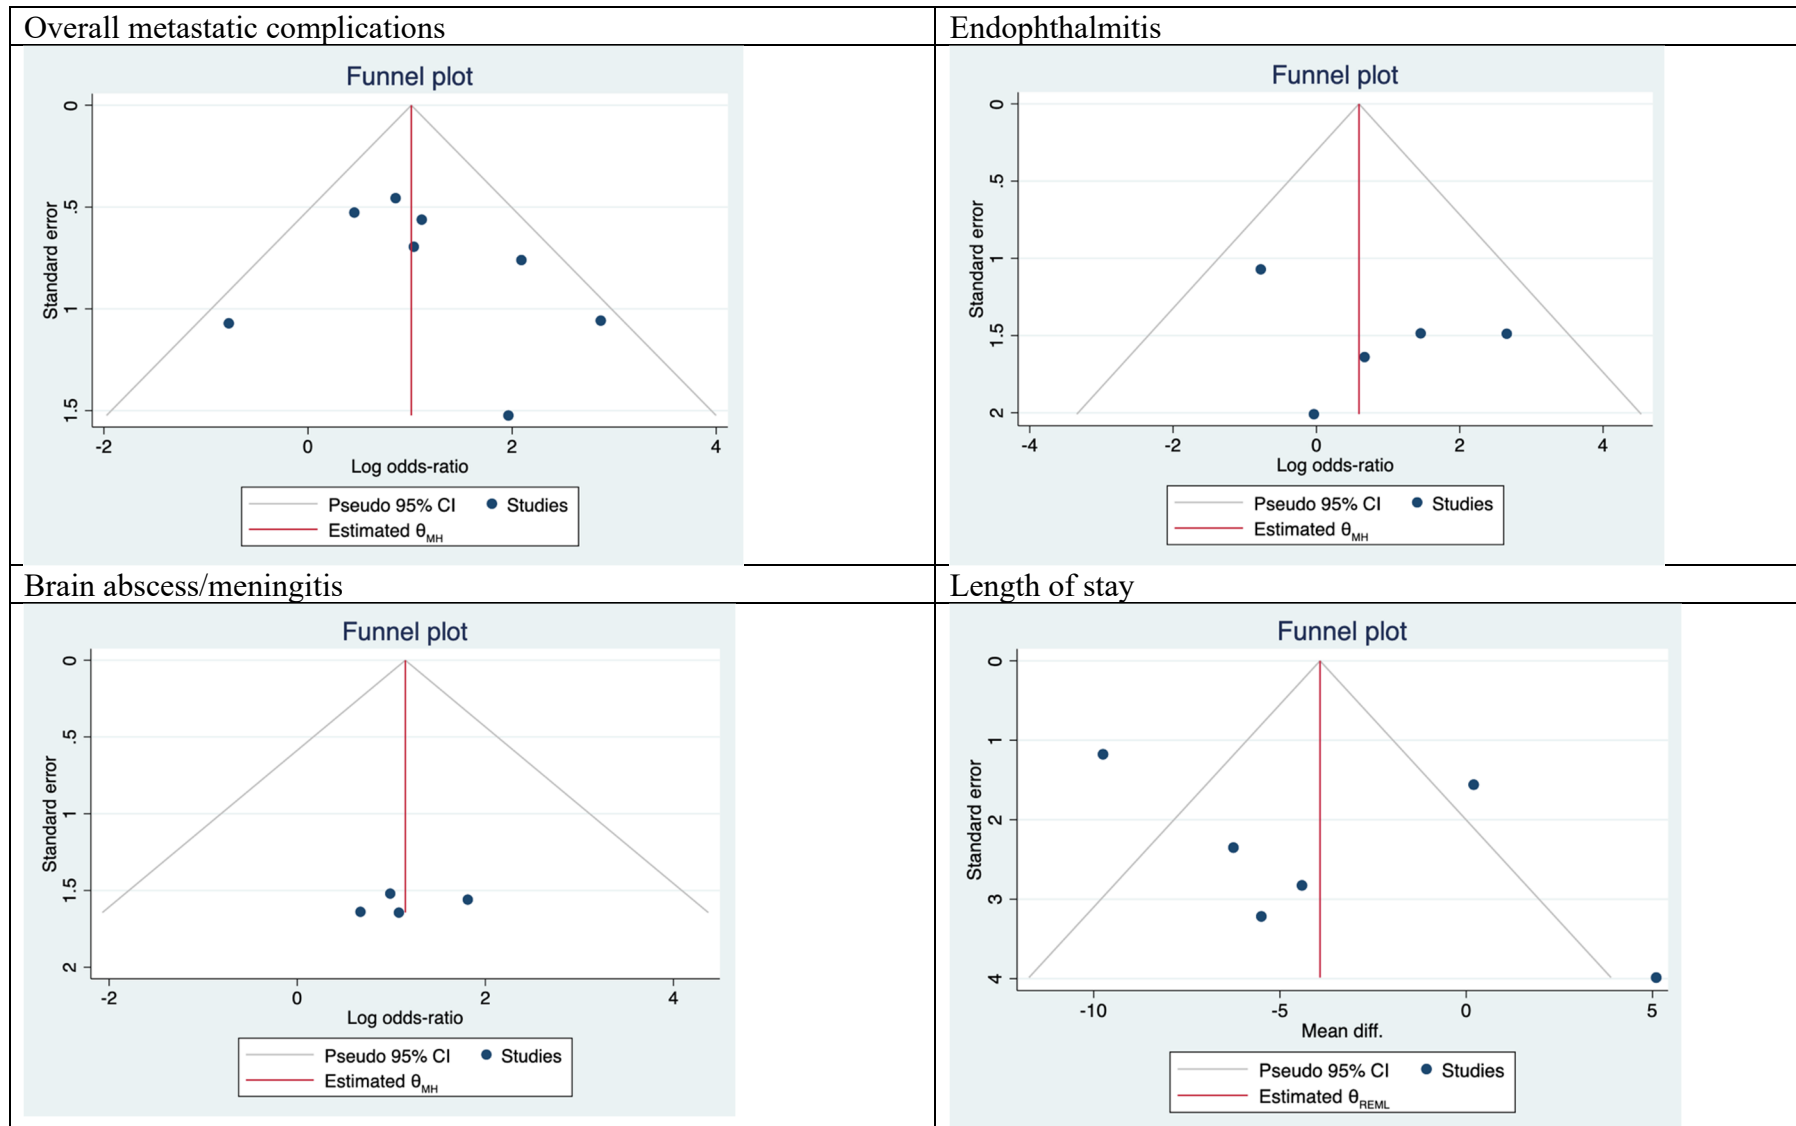

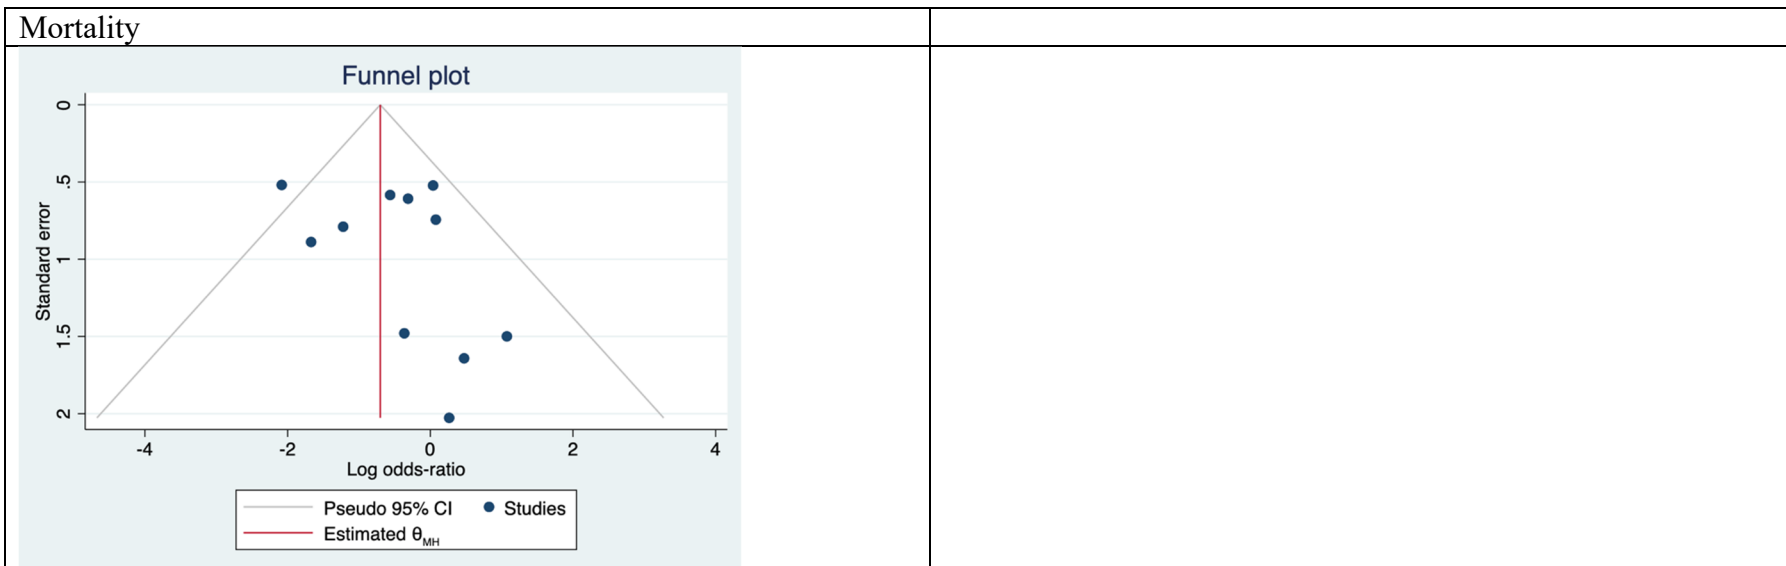



# Supplementary Figure S2: Clinical demographics comparing KPPLA versus N-KPPLA: (A)

Age, (B) Sex, (C) Diabetes mellitus, (D) History of hepatobiliary disease and (E) History of

malignancy. KPPLA: Klebsiella pneumoniae pyogenic liver abscess; N-KPPLA: Non-

KPPLA

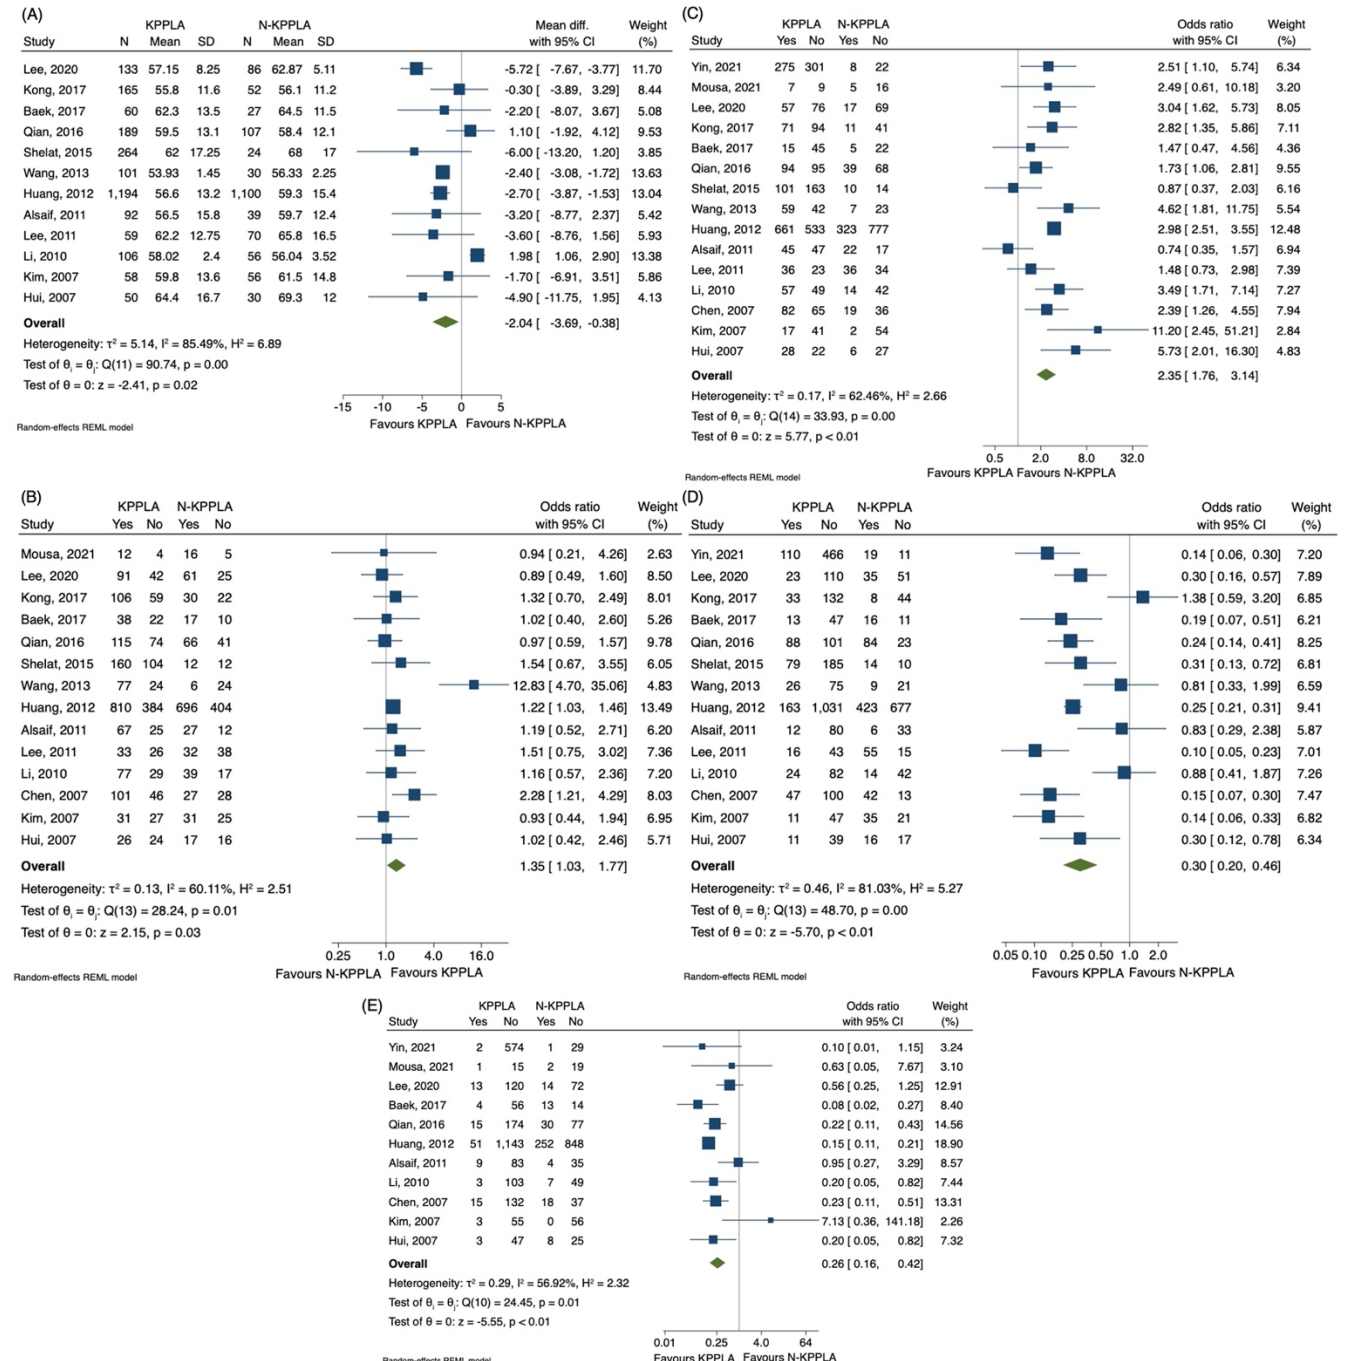

Supplementary Figure S3: Radiological findings comparing KPPLA versus non-KPPLA: (A) Multiple abscess, (B) Bilobar location, (C) Multi-loculation, (D) Gas formation, (E) Size, and (F) Presence of solid component. KPPLA: Klebsiella pneumoniae pyogenic liver abscess; N-KPPLA: Non-KPPLA

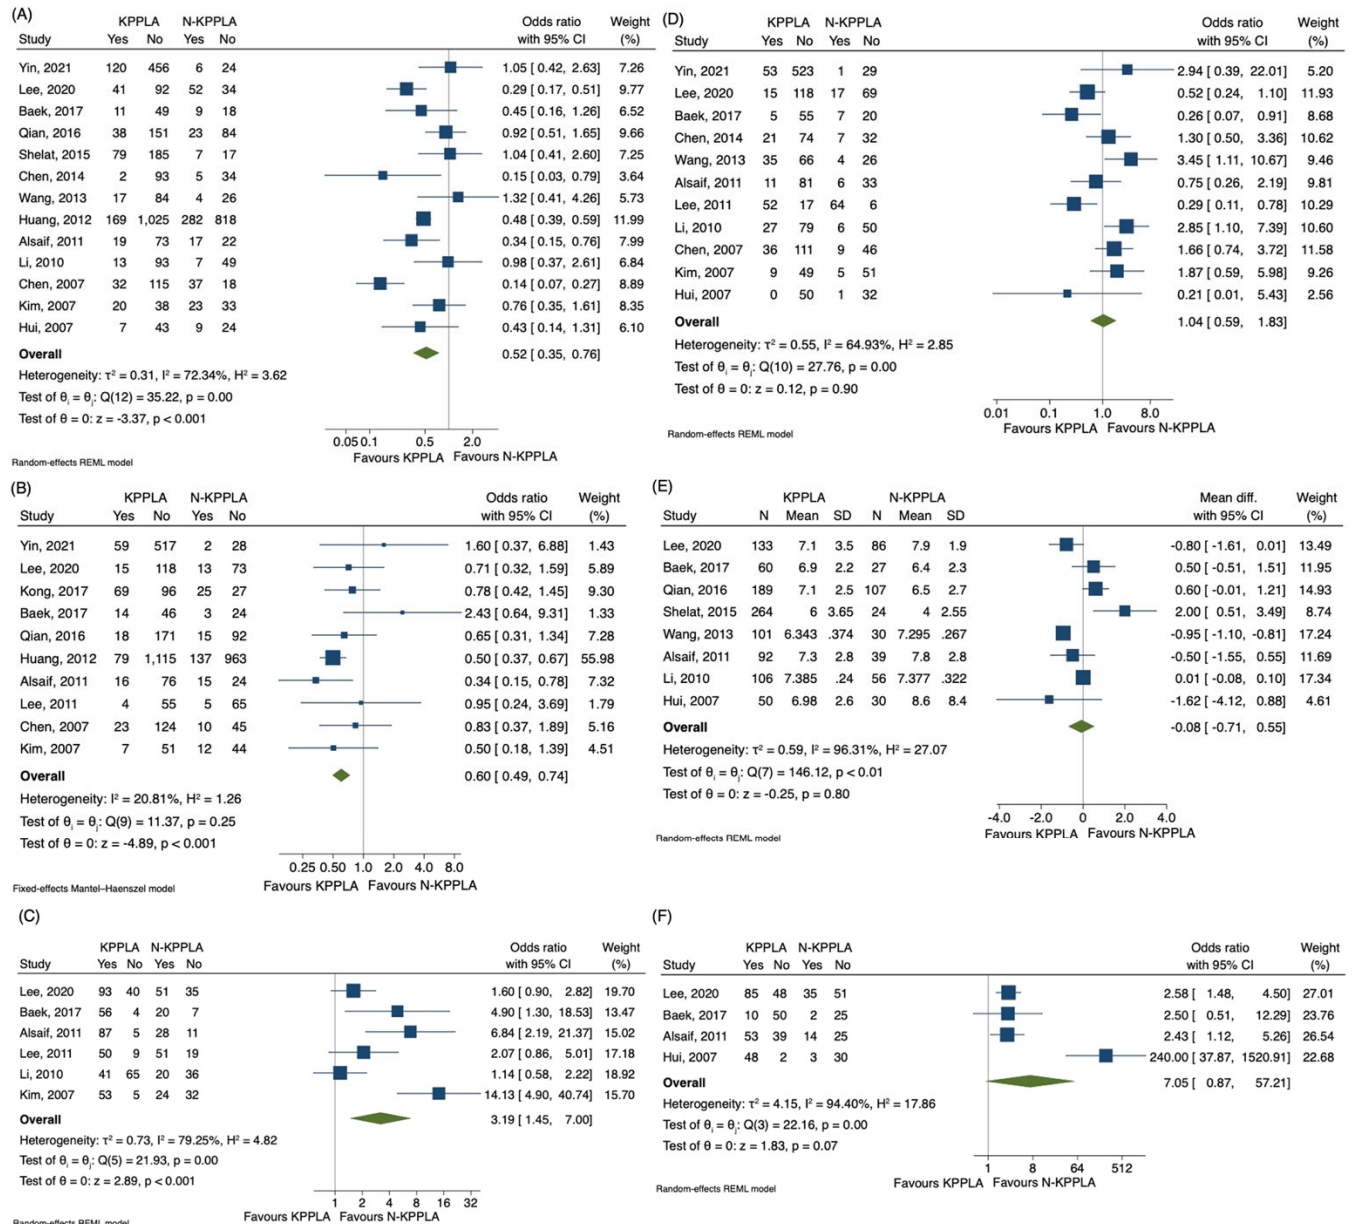

Supplementary Figure S4: Clinical outcomes of KPPLA versus N-KPPLA: (A) Length of stay, (B) Overall metastatic infections, (C) Endophthalmitis, (D) Brain abscess/meningitis, and (E) Mortality. KPPLA: Klebsiella pneumoniae pyogenic liver abscess; N-KPPLA: Non-KPPLA

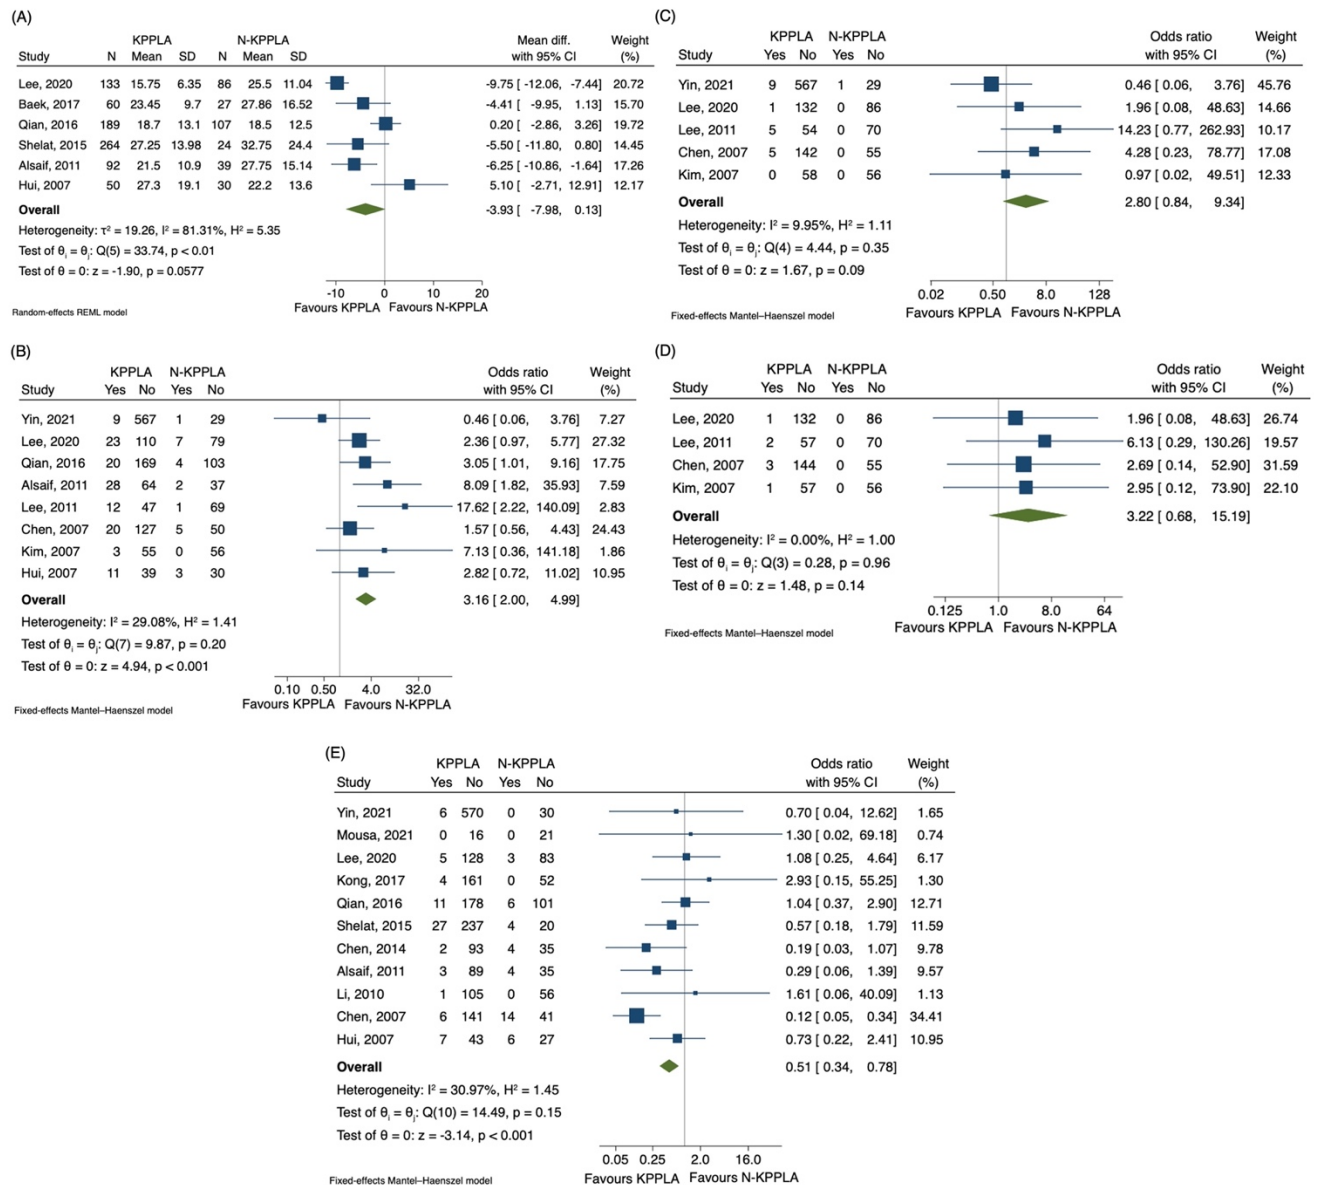

Supplement: s1 [file s1]
